# Supplementary material for: Modeling Ovo-vegetarian, Lacto-vegetarian, Pescatarian, and Vegan USDA Food Patterns and Assessing Nutrient Adequacy for Lactation among Adult Females
Source: PubMed Central journal article supplement (PMC10733672; doi:10.1016/j.cdnut.2023.102034), 2023-11-20
Supplement: mmc1.pdf [file mmc1.pdf]

**Supplemental Table 1.** Average Women’s Multivitamin and Mineral (MVM) Supplement Developed from the Dietary Supplement

Label Database

| <b>Common nutrients in MVM supplement intended for women 19-50y</b> | <b>Average amount of nutrient in Women’s MVM supplements</b> | <b>DRI Reference: Females 19-30y (2000 kcal) 30-50y (1800 kcal)</b> | <b>Percent of DRI attained from Women’s MVM Composite</b> | <b>DRI Reference: Lactation 19-30y (2400 kcal), 31-50y (2200 kcal) 0-12 months postpartum</b> | <b>Percent of DRI attained from Women’s MVM Composite</b> |
|---------------------------------------------------------------------|--------------------------------------------------------------|---------------------------------------------------------------------|-----------------------------------------------------------|-----------------------------------------------------------------------------------------------|-----------------------------------------------------------|
| Vitamin B <sub>12</sub> (mcg)                                       | 26.64                                                        | 2.4                                                                 | 1110.00                                                   | 2.8                                                                                           | 951.43                                                    |
| Vitamin B <sub>6</sub> (mcg)                                        | 3.73                                                         | 1.3                                                                 | 286.92                                                    | 2                                                                                             | 186.50                                                    |
| Vitamin C (mg)                                                      | 92.1                                                         | 75                                                                  | 122.80                                                    | 120                                                                                           | 76.75                                                     |
| Calcium (mg)                                                        | 277.09                                                       | 1000                                                                | 27.71                                                     | 1000                                                                                          | 27.71                                                     |
